# Supplementary material
Source: Springer Nature journal article supplement (http://www.springermedizin.de/resource/supplementary/12955_2009_585_MOESM4_ESM.pdf/9560762)

Health Status Questionnaire SF-36  
Physical Component Summary Score

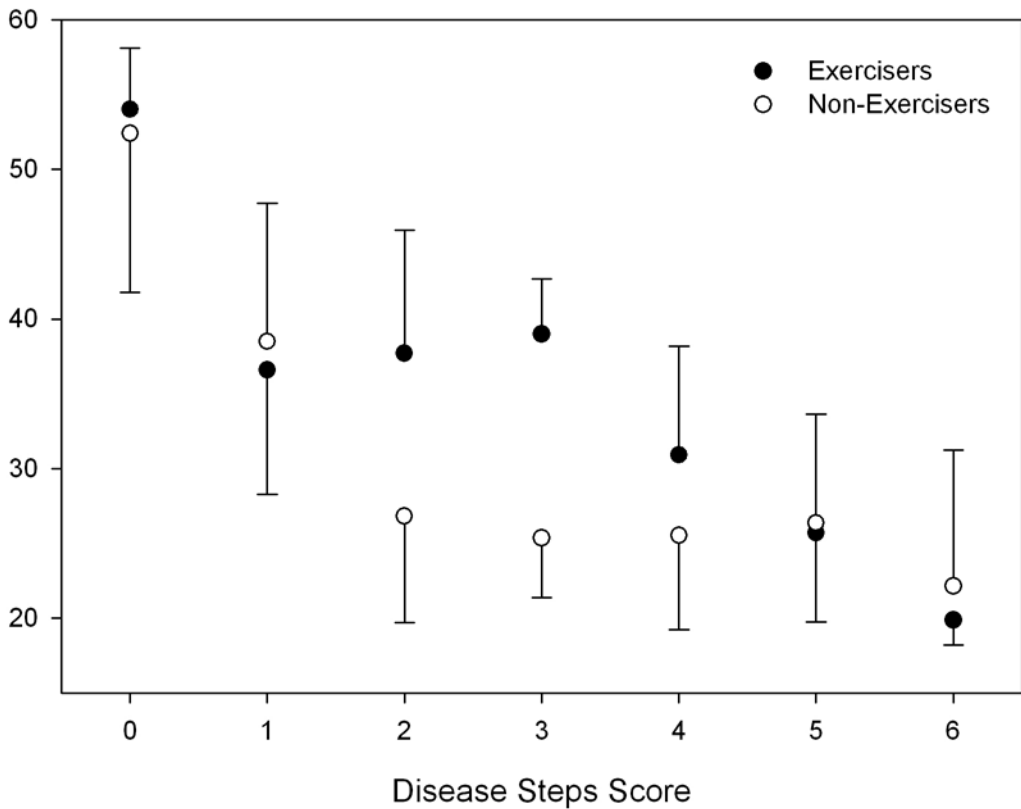

Supplement: MOESM4 [file 9560762]
